# Supplementary material for: Development of and User Feedback on a Board and Online Game to Educate on Antimicrobial Resistance and Stewardship
Source: Antibiotics (Basel). 2022 May 1;11(5):611. doi: 10.3390/antibiotics11050611 (PMC9138161; doi:10.3390/antibiotics11050611)
Supplement: Supplementary file 1 [file antibiotics-11-00611-s001.zip]

Archive with 4 entries (4 files):
- Supplementary S1_AMS Game Review Comments.pdf
- Supplementary S2_AMS Game guide slides .pdf
- Supplementary S3_AMS Game (Qs Selected for Global Tournament).pdf
- Supplementary S4 _AMS-Game-Flyer-WAAW21-3-1666x2048.jpg
